# Supplementary material
Source: Springer Nature journal article supplement (https://www.springermedizin.de/resource/supplementary/12889_2013_6823_MOESM3_ESM.pdf/9499106)

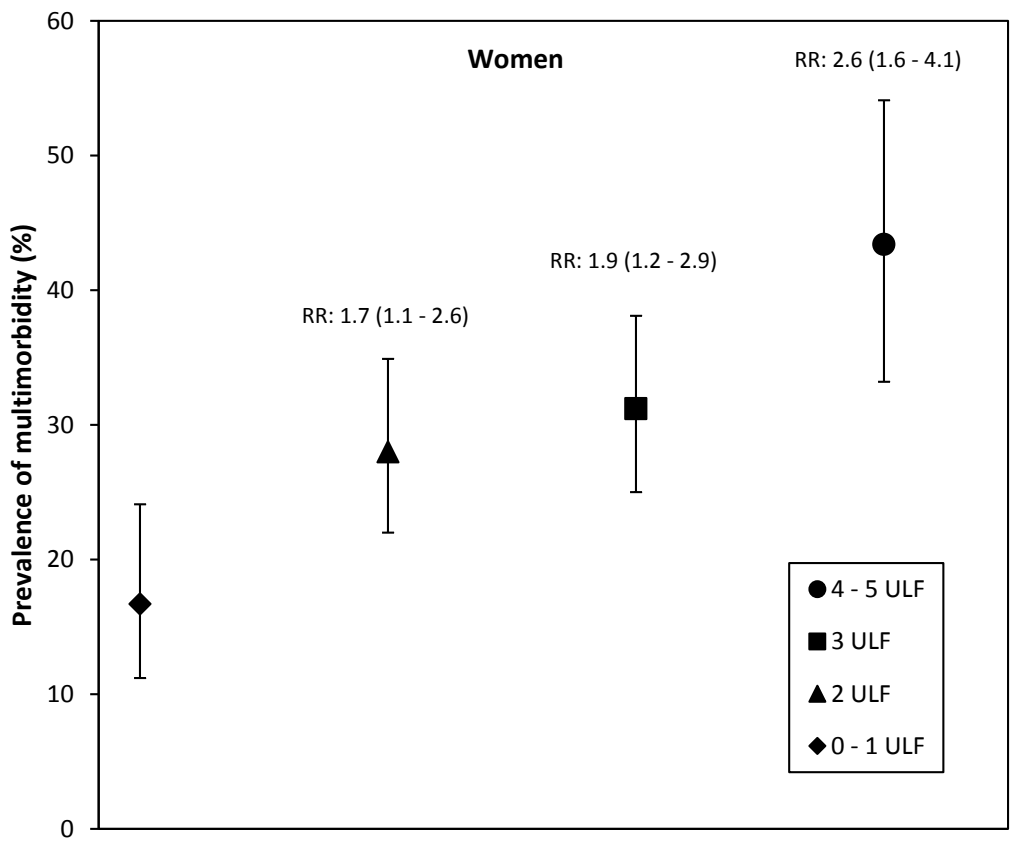

Supplement: MOESM3 [file 9499106]
